# Supplementary material
Source: MDPI journal article supplement (https://www.mdpi.com/2673-3994/4/1/1)
Supplement: s1 [file s1]

# Supporting Information: Techno-economic analysis of large scale production of poly(oxymethylene) dimethyl ether fuels from methanol in water-tolerant processes

Yannic Tönges<sup>a</sup>, Vincent Dieterich<sup>b</sup>, Sebastian Fendt<sup>b</sup>, Hartmut Spliethoff<sup>b</sup>, Jakob Burger<sup>\*a</sup>

<sup>a</sup>*Technical University of Munich, Campus Straubing for Biotechnology and Sustainability, Laboratory of Chemical Process Engineering, Uferstraße 53, Straubing, 94315, Bavaria, Germany.*

<sup>b</sup>*Technical University of Munich, TUM School of Engineering and Design, Chair of Energy Systems, Boltzmannstraße 15, Garching, 85748, Bavaria, Germany.*

*\*Corresponding author: burger@tum.de*

## 1. Additional information on the processes

This section gives process flow diagrams, stream tables, energy balances, and descriptions of the investigated processes. For processes for which the full stream and energy tables were not available in the original literature but calculated in this work, the specifications used as input for the simulation are highlighted in **bold**.

### 1.1. Process I: Production of FA with complete conversion of ME

Process I produces an aqueous solution of 0.5 g/g FA. We chose the BASF silver process, which uses a reactor with a silver catalyst and complete conversion of ME in one pass [1]. The left panel in Figure 1 shows the respective process flow diagram (PFD). The reactor conversion and selectivity as well as the composition of the Feed, the absorber off-gas, and the absorber bottom product are adopted from Ullmann’s Encyclopedia of Industrial Chemistry [1].

Methanol (1) is evaporated in the evaporator E1 and mixed with steam, air (2), and recycled off-gas (9) from the absorber A1, mainly composed of N<sub>2</sub> and H<sub>2</sub>. The recycle mass flow rate is adjusted so that the resulting mixture is outside of the explosive limits. The explosive limits are calculated considering the limiting oxygen concentration of the mixture [2, 3]. The gaseous mixture (3) is superheated in heat exchanger HX1 and passed over a shallow bed of silver crystals. The water in the mixture enhances conversion and selectivity; the optimal molar ratio of ME to Water is **60/40** [4]. The product leaves the reactor at **680 °C**, conversion of ME is **99%**, the yield **90%** [1]. The reactor product (4) is immediately cooled in HX2 to prevent the disintegration of gaseous FA; the excess heat is utilized to produce steam.

The cooled gases (5) are fed to the bottom of the absorption column A1, modeled with **4** vapor-liquid equilibrium (VLE) stages. At the bottom of A1, a liquid solution is drawn, cooled, and recycled to its top. Water is added to the top of A1 to enhance FA absorption. The off-gases (7) from the

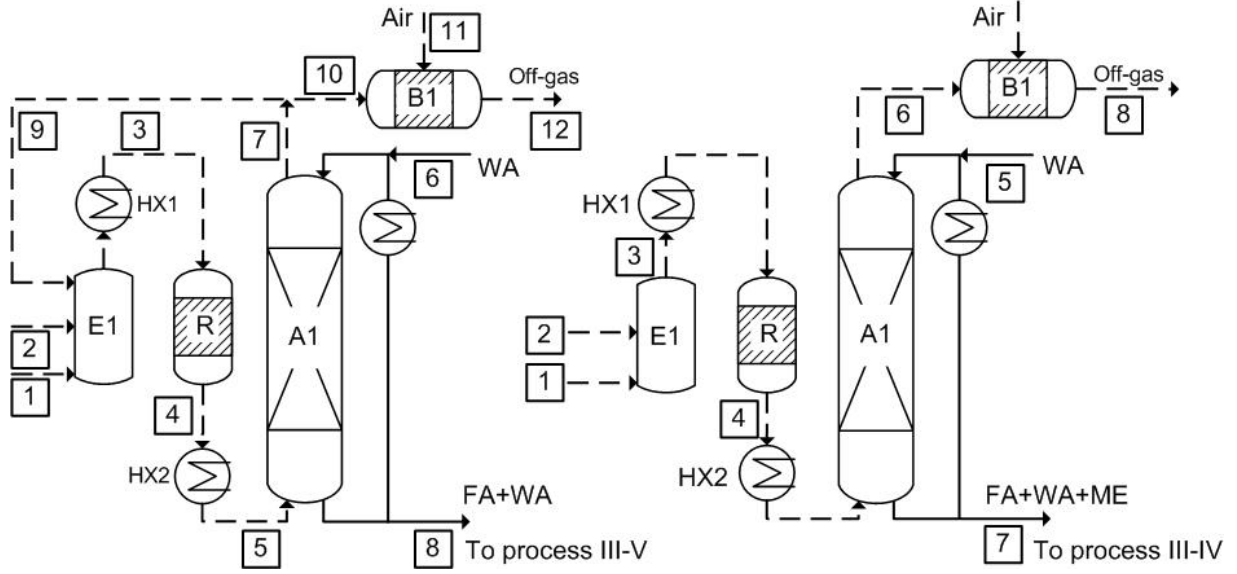

Figure 1: Process flow diagram of Process I (left panel) and Process II (right panel).

absorber contain small traces of FA and ME. Part of them are recycled as stream (9), the remainder is burned in the burner B1 with excess air (11) to generate steam. The solution (8) drawn from the bottom of A1 contains 0.5 g/g FA and WA with small traces of ME. Tables 1 and 2 give the stream table and unit data of the process.

Table 1: Stream Table Process I

| Stream             | 1      | 2       | 3            | 4             | 5       | 6      | 7            | 8            | 9       | 10      | 11     | 12      |
|--------------------|--------|---------|--------------|---------------|---------|--------|--------------|--------------|---------|---------|--------|---------|
| $\dot{m}$ / kg/h   | 942.57 | 1354.52 | 4091.58      | 4091.59       | 4091.59 | 136.90 | 2991.55      | 1236.93      | 1794.50 | 1197.05 | 565.98 | 1763.03 |
| $p$ / bar          | 1.00   | 1.00    | <b>1.00</b>  | 1.00          | 1.00    | 1.00   | <b>1.00</b>  | 1.00         | 1.00    | 1.00    | 1.00   | 1.00    |
| $T/^\circ\text{C}$ | 25.00  | 25.00   | 241.97       | <b>679.18</b> | 160.00  | 25.00  | <b>35.51</b> | 65.61        | 35.51   | 35.51   | 25.00  | 160.00  |
| $x_i$ / g/g        |        |         |              |               |         |        |              |              |         |         |        |         |
| FA                 | -      | -       | -            | <b>0.153</b>  | 0.153   | -      | <b>0.001</b> | <b>0.504</b> | 0.001   | 0.001   | -      | -       |
| WA                 | 0.216  | -       | <b>0.068</b> | <b>0.146</b>  | 0.146   | 1.000  | 0.042        | 0.492        | 0.042   | 0.042   | -      | 0.105   |
| ME                 | 0.784  | -       | <b>0.181</b> | <b>0.002</b>  | 0.002   | -      | 0.001        | 0.003        | 0.001   | 0.001   | -      | -       |
| CO <sub>2</sub>    | -      | -       | 0.031        | 0.053         | 0.053   | -      | 0.072        | -            | 0.072   | 0.072   | -      | 0.054   |
| N <sub>2</sub>     | -      | 0.767   | 0.634        | 0.634         | 0.634   | -      | 0.868        | -            | 0.868   | 0.868   | 0.767  | 0.835   |
| O <sub>2</sub>     | -      | 0.233   | 0.078        | 0.001         | 0.001   | -      | 0.002        | -            | 0.002   | 0.002   | 0.233  | 0.007   |
| H <sub>2</sub>     | -      | -       | 0.005        | 0.009         | 0.009   | -      | 0.012        | -            | 0.012   | 0.012   | -      | -       |
| CO                 | -      | -       | 0.001        | 0.002         | 0.002   | -      | 0.003        | -            | 0.003   | 0.003   | -      | -       |

Table 2: Unit operations data Process I

| Unit:             | $T/^{\circ}\text{C}$ | $p / \text{bar}$ | $\dot{Q} / \text{kW}$ |
|-------------------|----------------------|------------------|-----------------------|
| E <sub>1</sub>    | 49.04                | 1.00             | 405.03                |
| HX <sub>1,1</sub> | 140.00               | 1.00             | 129.11                |
| HX <sub>1,2</sub> | 210.00               | 1.00             | 103.18                |
| HX <sub>1,3</sub> | 241.97               | 1.00             | 46.68                 |
| R                 | 680.00               | 1.00             | -                     |
| HX <sub>2,1</sub> | 300.00               | 1.00             | -643.71               |
| HX <sub>2,2</sub> | 230.00               | 1.00             | -110.37               |
| HX <sub>2,3</sub> | 160.00               | 1.00             | -107.84               |
| A <sub>1</sub>    | 35.51                | 1.00             | -394.29               |
| B <sub>1,1</sub>  | 300.00               | 1.00             | -365.15               |
| B <sub>1,2</sub>  | 230.00               | 1.00             | -39.65                |
| B <sub>1,3</sub>  | 160.00               | 1.00             | -39.10                |

### 1.1.1. Process II: Production of FA with incomplete conversion of ME

The production of FA with incomplete conversion of methanol is similar to Process I. The right panel in Figure 1 shows the respective PFD. Besides FA and WA, the reactor product (4) also contains unreacted ME. It is absorbed in water, resulting in liquid (7). The absorber off-gas (6) is burned with air to generate steam; a recycle is not required. An advantage is the reactor's lower conversions, which could lead to higher selectivities. We adopted the operating point of the reactor and the resulting absorber product from the literature; it consists of 0.509 g/g FA, 0.205 g/g ME, and Water [5]. Tables 3 and 4 give the stream table and unit data of the process.

Table 3: Stream Table Route 4 Process II

| Stream                  | 1       | 2       | 3       | 4            | 5      | 6       | 7            | 8       |
|-------------------------|---------|---------|---------|--------------|--------|---------|--------------|---------|
| $\dot{m} / \text{kg/h}$ | 1125.20 | 1270.35 | 2395.55 | 2395.55      | 174.47 | 1345.57 | 1224.48      | 3002.25 |
| $p / \text{bar}$        | 1.00    | 1.00    | 1.00    | <b>1.00</b>  | 2.75   | 1.00    | <b>1.00</b>  | 1.00    |
| $T/^{\circ}\text{C}$    | 25.00   | 25.00   | 44.90   | 705.74       | 25.00  | 25.03   | <b>69.50</b> | 160.00  |
| $x_i / \text{g/g}$      |         |         |         |              |        |         |              |         |
| FA                      | -       | -       | -       | <b>0.264</b> | -      | 0.008   | <b>0.509</b> | -       |
| WA                      | -       | -       | -       | <b>0.092</b> | 0.876  | 0.016   | <b>0.286</b> | 0.144   |
| ME                      | 1.000   | -       | 0.470   | <b>0.106</b> | 0.124  | 0.018   | 0.205        | 0.000   |
| CO <sub>2</sub>         | -       | -       | -       | <b>0.112</b> | -      | 0.199   | -            | 0.105   |
| N <sub>2</sub>          | -       | 0.770   | 0.408   | <b>0.408</b> | -      | 0.727   | -            | 0.751   |
| O <sub>2</sub>          | -       | 0.230   | 0.122   | -            | -      | -       | -            | -       |
| H <sub>2</sub>          | -       | -       | -       | 0.018        | -      | 0.032   | -            | -       |
| CO                      | -       | -       | -       | -            | -      | -       | -            | -       |

Table 4: Unit operations data Route 4 Process II

| Unit:             | $T/^{\circ}\text{C}$ | $p/\text{bar}$ | $\dot{Q}/\text{kW}$ |
|-------------------|----------------------|----------------|---------------------|
| E <sub>1</sub>    | 44.90                | 1.00           | 381.19              |
| HX <sub>1,1</sub> | 140.00               | 1.00           | 79.56               |
| HX <sub>1,2</sub> | 210.00               | 1.00           | 63.37               |
| R                 | 705.74               | 1.00           | -                   |
| HX <sub>2,1</sub> | 300.00               | 1.00           | -480.84             |
| HX <sub>2,2</sub> | 230.00               | 1.00           | -74.41              |
| HX <sub>2,3</sub> | 160.00               | 1.00           | -71.65              |
| B <sub>1,1</sub>  | 300.00               | 1.00           | -1321.30            |
| B <sub>1,2</sub>  | 230.00               | 1.00           | -69.86              |
| B <sub>1,3</sub>  | 160.00               | 1.00           | -68.70              |
| A <sub>1</sub>    | 25.00                | 1.00           | -644.68             |

### 1.1.2. Process II': Production of FA and fast condensation

A process proposed by Kloepper et al. [6] suggests the fast condensation of the reactor product of an FA plant with incomplete conversion. Figure 2 gives a PFD of the process. All stream compositions are adopted from the original work.

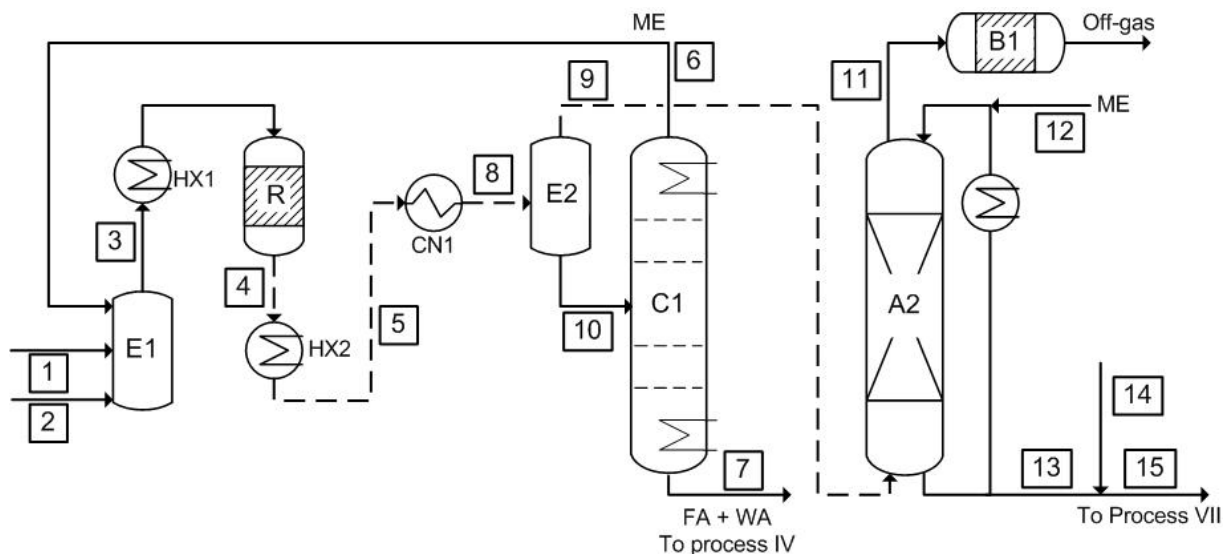

Figure 2: PFD of the process proposed by Kloepper et al..

The reactor product (4) (neglecting noncondensable components) consists of **0.445** g/g FA and **0.314** g/g ME and Water. It is subsequently cooled in HX1 to prevent the disintegration of FA. The obtained stream (5) is fed to condenser CN1. CN1 rapidly cools stream (5) to **53°C**, and the phase separator E2 splits it into the water-rich liquid (10) and the FA-rich gaseous stream (9). Stream (9) is absorbed in ME in the absorber A2 that has recirculation. The product (13) consists of 0.628

g/g FA, 0.311 g/g ME, and WA.

Stream (10) is fed to distillation column C1, where pure ME is recovered at the top (6) and recycled, and aqueous FA solution is removed as the bottom product (7). Depending on demand, product (7) can be sold as aqueous FA solution. Here stream (7) is also converted to OME feedstock using a pervaporation unit (Process VI), allowing a better comparison to the other routes. Tables 5 and 6 give the stream table and unit data of process II', tables 19 and 20 of the added pervaporation process (cf. Section 1.1.5). The mixed end product fed to process VII are 1030.61 kg of a solution of 0.603 g/g FA, 0.367 g/g ME and 0.03 g/g WA.

Table 5: Stream Table Process II'

| Stream           | 1       | 2       | 3            | 4            | 5       | 6            | 7            | 8            | 9            | 10           | 11           | 12           | 13     | 14    | 15     |
|------------------|---------|---------|--------------|--------------|---------|--------------|--------------|--------------|--------------|--------------|--------------|--------------|--------|-------|--------|
| $\dot{m}$ / kg/h | 1438.22 | 1174.79 | 2613.00      | 2613.00      | 2613.00 | 335.30       | 670.94       | 2613.00      | 1605.87      | 1007.13      | 1220.60      | 33.30        | 418.56 | 29.70 | 448.27 |
| $p$ / bar        | 1.00    | 1.00    | 1.00         | 1.00         | 1.00    | 1.00         | 1.00         | 1.03         | 1.03         | 1.03         | 1.03         | 1.03         | 1.03   | 1.03  | 1.03   |
| $T$ / °C         | 25.00   | 25.00   | 43.89        | 810.12       | 160.00  | 64.57        | 99.20        | <b>53.00</b> | <b>53.00</b> | <b>53.00</b> | 11.18        | 16.00        | 23.99  | 25.00 | 26.22  |
| $x_i$ / g/g      |         |         |              |              |         |              |              |              |              |              |              |              |        |       |        |
| FA               | -       | -       | -            | <b>0.242</b> | 0.242   | -            | 0.542        | 0.242        | <b>0.167</b> | <b>0.361</b> | <b>0.004</b> | -            | 0.629  | -     | 0.587  |
| WA               | -       | -       | -            | <b>0.131</b> | 0.131   | 0.014        | 0.451        | 0.131        | <b>0.022</b> | <b>0.305</b> | 0.007        | -            | 0.059  | -     | 0.055  |
| ME               | -       | 1.000   | <b>0.450</b> | <b>0.171</b> | 0.171   | <b>0.985</b> | <b>0.007</b> | 0.171        | 0.069        | 0.333        | <b>0.011</b> | <b>1.000</b> | 0.311  | 1.000 | 0.357  |
| CO <sub>2</sub>  | -       | -       | -            | 0.028        | 0.028   | -            | -            | -            | 0.028        | -            | 0.060        | -            | -      | -     | -      |
| N <sub>2</sub>   | 0.770   | -       | 0.424        | 0.424        | 0.424   | -            | -            | 0.424        | 0.689        | -            | 0.907        | -            | -      | -     | -      |
| O <sub>2</sub>   | 0.230   | -       | <b>0.127</b> | -            | -       | -            | -            | -            | -            | -            | -            | -            | -      | -     | -      |
| H <sub>2</sub>   | -       | -       | -            | 0.004        | 0.004   | -            | -            | 0.004        | 0.007        | -            | 0.009        | -            | -      | -     | -      |
| CO               | -       | -       | -            | -            | -       | -            | -            | -            | -            | -            | -            | -            | -      | -     | -      |

Table 6: Unit operations data Process II'

| Unit:             | $T$ / °C | $p$ / bar | $\dot{Q}$ / kW | Distillation columns | $C_1$   |
|-------------------|----------|-----------|----------------|----------------------|---------|
| E <sub>1</sub>    | 43.89    | 1.00      | 397.13         | $\dot{Q}_{top}$ / kW | -549.87 |
| HX <sub>1,1</sub> | 140.00   | 1.00      | 86.82          | $T_{top}$ / °C       | 64.57   |
| CN <sub>1</sub>   | 53.00    | 1.03      | -629.44        | $\dot{Q}_{bot}$ / kW | 605.37  |
| R                 | 810.12   | 1.00      | -              | $T_{bot}$ / °C       | 99.20   |
| HX <sub>2,1</sub> | 300.00   | 1.00      | -643.70        | $p$ / bar            | 1.00    |
| HX <sub>2,2</sub> | 230.00   | 1.00      | -76.11         | N                    | 24.00   |
| HX <sub>2,3</sub> | 160.00   | 1.00      | -72.77         | N <sup>Feed</sup>    | 10.00   |
| B <sub>1,1</sub>  | 300.00   | 1.00      | -313.15        | RR                   | 4.28    |
| B <sub>1,2</sub>  | 230.00   | 1.00      | -39.13         |                      |         |
| B <sub>1,3</sub>  | 160.00   | 1.00      | -38.61         |                      |         |

### 1.1.3. Process III: Thin-film evaporation

The technology to produce stable, highly concentrated FA solutions using thin-film evaporators (TFE) is well established [7, 8, 9]. In previous work [10], we developed a process that employs a TFE to produce OME-feedstock from either aqueous FA (Route 1) or water-methanol formaldehyde solutions (Route 4), Figure 3 shows a PFD. The process is adopted without modification; complete stream tables and energy balances are taken from the original literature [10].

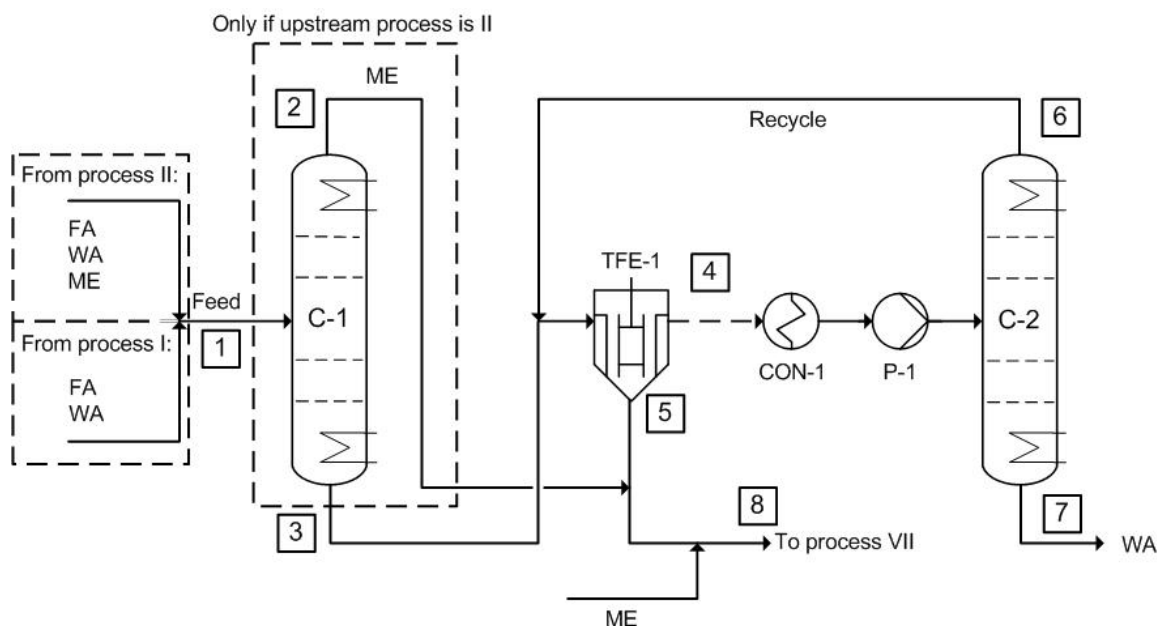

Figure 3: PFD of Process III. C1 is only required if the Feed contains methanol (Route 4)

The feed (1) is fed to distillation column C1, where parts of the methanol are removed as the top product (2) (Column C1 is not required in Route 1, and the feed is fed directly to the thin-film evaporator TFE1). The bottom product (3) is fed to the thin-film evaporator TFE1, in which it is partially evaporated, yielding a gaseous, FA-lean top product (4). The liquid residual (5) of the TFE is a concentrated FA solution with small amounts of ME and WA. It is mixed with ME to yield the OME feedstock (8). The top product (4) of TFE1 is condensed in the condenser CON1 and fed to the distillation column C2. C2 removes pure WA as the bottom product (7), the top product (6) is recycled, mixed with stream (3), and fed to TFE1. Based on the fed FA solution, the OME-feedstock contains 0.1 (Route 1) or 0.12 (Route 4) g/g water. Tables 7 to 9 give the stream table and unit data of the process for Route 1, tables 10 to 12 for Route 4.

Table 7: Stream Table Process III, Route 1

| Stream           | 1       | 4      | 5      | 6      | 7      | 8       |
|------------------|---------|--------|--------|--------|--------|---------|
| $\dot{m}$ / kg/h | 1236.93 | 806.10 | 762.40 | 331.56 | 474.54 | 1135.98 |
| $p$ / bar        | 25.00   | 0.20   | 0.20   | 4.00   | 4.00   | 1.00    |
| $T$ /°C          | 65.61   | 120.47 | 120.47 | 136.19 | 143.47 | 100.73  |
| $x_i$ / g/g      |         |        |        |        |        |         |
| FA               | 0.504   | 0.222  | 0.816  | 0.536  | 0.003  | 0.548   |
| WA               | 0.492   | 0.772  | 0.178  | 0.449  | 0.997  | 0.120   |
| ME               | 0.003   | 0.006  | 0.005  | 0.015  | -      | 0.332   |

Table 8: Unit operations data Process III, Route 1

| Unit:            | $T$ /°C | $p$ / bar | $\dot{W}$ / kW | $\dot{Q}$ / kW |
|------------------|---------|-----------|----------------|----------------|
| TFE              | 120.47  | 0.20      | -              | 528.16         |
| CON <sub>1</sub> | 45.00   | 0.20      | -              | -535.84        |

Table 9: Columns Process III, Route 1

| Distillation columns | C <sub>2</sub> |
|----------------------|----------------|
| $\dot{Q}_{top}$ / kW | -439.44        |
| $T_{top}$ /°C        | 136.19         |
| $\dot{Q}_{bot}$ / kW | 544.88         |
| $T_{bot}$ /°C        | 143.47         |
| $p$ / bar            | 4.00           |
| N                    | 24.00          |
| N <sup>Feed</sup>    | 14.00          |
| RR                   | 1.73           |

Table 10: Stream Table Process III, Route 4

| Stream           | 1       | 2      | 3       | 4      | 5      | 6      | 7      | 8       |
|------------------|---------|--------|---------|--------|--------|--------|--------|---------|
| $\dot{m}$ / kg/h | 1224.48 | 212.85 | 1011.63 | 619.15 | 771.79 | 379.31 | 239.84 | 1111.10 |
| $p$ / bar        | 1.00    | 0.50   | 0.50    | 0.20   | 0.20   | 4.00   | 4.00   | 40.00   |
| $T$ /°C          | 69.50   | 47.84  | 83.43   | 118.12 | 118.12 | 135.22 | 143.67 | 105.42  |
| $x_i$ / g/g      |         |        |         |        |        |        |        |         |
| FA               | 0.509   | -      | 0.616   | 0.264  | 0.806  | 0.428  | 0.003  | 0.560   |
| WA               | 0.286   | 0.010  | 0.344   | 0.637  | 0.141  | 0.409  | 0.997  | 0.100   |
| ME               | 0.205   | 0.990  | 0.040   | 0.100  | 0.053  | 0.163  | -      | 0.340   |



Table 11: Unit operations data Process III, Route 4

| Unit:            | $T/^{\circ}\text{C}$ | $p / \text{ bar}$ | $\dot{Q} / \text{ kW}$ |
|------------------|----------------------|-------------------|------------------------|
| TFE              | 118.12               | 0.20              | 359.30                 |
| CON <sub>1</sub> | 57.94                | 0.20              | -373.22                |

Table 12: Columns Process III, Route 4

| Distillation columns         | C <sub>1</sub> | C <sub>2</sub> |
|------------------------------|----------------|----------------|
| $\dot{Q}_{top} / \text{ kW}$ | -830.89        | -580.75        |
| $T_{top}/^{\circ}\text{C}$   | 47.84          | 135.22         |
| $\dot{Q}_{bot} / \text{ kW}$ | 506.07         | 663.77         |
| $T_{bot}/^{\circ}\text{C}$   | 83.43          | 143.67         |
| $p / \text{ bar}$            | 0.50           | 4.00           |
| N                            | 28.00          | 22.00          |
| N <sup>Feed</sup>            | 16.00          | 14.00          |
| RR                           | 6.13           | 2.60           |

#### 1.1.4. Process III\*, Thin-film evaporation

Mantei et al. [11] previously suggested a simpler FA concentration based on thin-film evaporation. In their work, two thin-film evaporators are employed to produce OME feedstock, cf. Figure 4. The process is adopted without modification; the complete stream table and PFD were provided by Mantei et al. [11].

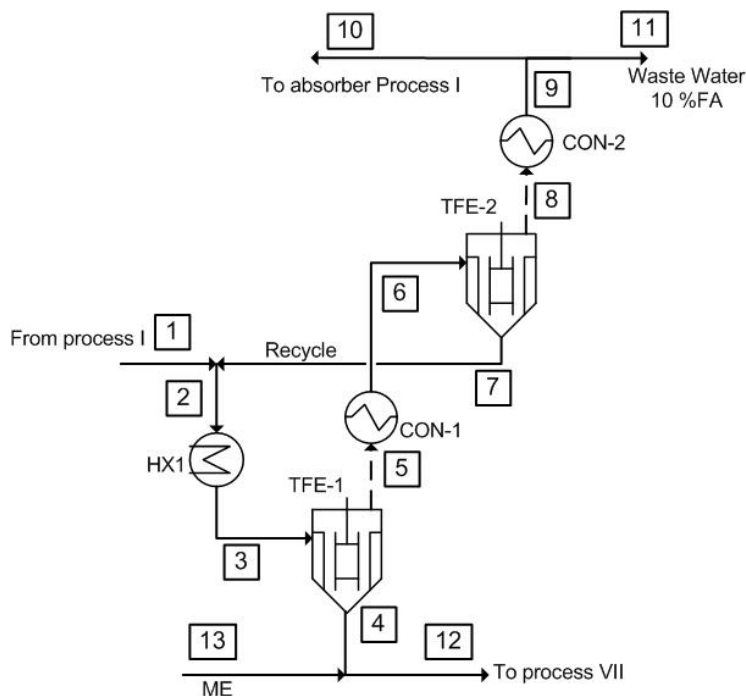

Figure 4: PFD of Process III\* adopted from Mantei et al. [11].

The aqueous FA solution from Process I (1) is preheated, fed to TFE1, concentrated to 0.86 g/g FA (4), and mixed with ME to produce OME feedstock (8). The top product of TFE1 (5) is condensed and fed to TFE2. The bottom product of TFE2 (7) is recycled and mixed with the feed. The top product (8) is condensed, and part of it is recycled to Process I to be used as an absorbent in the absorber; part of it is removed as wastewater. The material and energy balance was adopted from Mantei et al. [11]. 8 wt% of all fed FA is lost in the wastewater stream (11). Tables 13 to 14 give the stream table and unit data of the process.

Table 13: Stream Table Process III\*

| Stream           | 1       | 2       | 3       | 4      | 5      | 6      | 7      | 8      | 9      | 10    | 11     | 12      | 13     |
|------------------|---------|---------|---------|--------|--------|--------|--------|--------|--------|-------|--------|---------|--------|
| $\dot{m}$ / kg/h | 1364.86 | 1598.12 | 1598.12 | 723.76 | 874.36 | 874.36 | 233.26 | 641.10 | 641.10 | 88.22 | 552.88 | 1099.42 | 375.66 |
| $p$ / bar        | 0.07    | 0.07    | 0.07    | 0.07   | 0.07   | 0.20   | 0.20   | 0.20   | 0.20   | 1.00  | 1.00   | 1.00    | 1.00   |
| $T$ / °C         | 44.83   | 45.30   | 50.00   | 50.00  | 50.00  | 40.00  | 40.00  | 40.00  | 30.00  | 30.12 | 30.12  | 25.00   | 25.00  |
| $x_i$ / g/g      |         |         |         |        |        |        |        |        |        |       |        |         |        |
| FA               | 0.503   | 0.537   | 0.537   | 0.860  | 0.269  | 0.269  | 0.731  | 0.101  | 0.101  | 0.101 | 0.101  | 0.566   | -      |
| WA               | 0.490   | 0.458   | 0.458   | 0.137  | 0.723  | 0.723  | 0.269  | 0.888  | 0.888  | 0.888 | 0.888  | 0.090   | -      |
| ME               | 0.007   | 0.006   | 0.006   | 0.003  | 0.008  | 0.008  | -      | 0.011  | 0.011  | 0.011 | 0.011  | 0.344   | 1.000  |

Table 14: Unit operations data Process III\*

| Unit:            | $T$ / °C | $p$ / bar | $\dot{Q}$ / kW |
|------------------|----------|-----------|----------------|
| HX <sub>1</sub>  | 50.00    | 0.07      | 136.83         |
| TFE <sub>1</sub> | 50.00    | 0.20      | 415.45         |
| CON <sub>1</sub> | 40.00    | 0.20      | -382.52        |
| TFE <sub>2</sub> | 40.00    | 0.20      | 282.35         |
| CON <sub>2</sub> | 40.00    | 0.20      | -434.56        |

#### 1.1.5. Process IV, Pervaporation

Pervaporation has been successfully applied for the removal of water from various organic solvents, for example, ethanol [12, 13] and has been suggested for the removal of water from aqueous and methanolic FA solutions in patent literature [14, 15]. Furthermore, it has been proven in lab-scale experiments that pervaporation can be used to remove water from a stream composed of FA, WA, ME, and OME in the OME production process. In the referred study [16] suitable membrane materials have been identified regarding flux, permeate purity, and stability. Figure 3 shows a PFD for a pervaporation unit based on these works considered here for the removal of water from FA solutions.

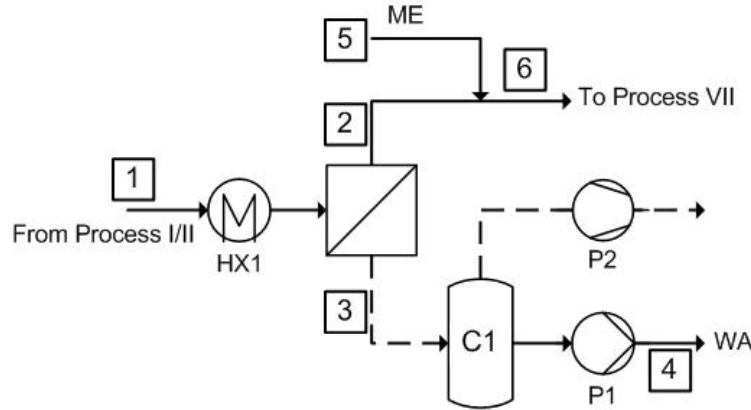

Figure 5: PFD of the pervaporation unit including utility.

FA solution (1) is preheated in HX1 and fed to the membrane module M1 equipped with a hydrophilic polymeric membrane, PERVAP 4101 [16]. The pressure at the permeate side has to be sufficiently low to provide enough driving force; a pressure of 0.032 bar is chosen here. The water passes through the membrane to the permeate side; the module is adiabatic. The vapor (3) is condensed in CON1. The pump P1 conveys the condensed water, and a small auxiliary compressor attached to CON1 removes traces of inert gas. We assume the permeate has the same composition as in the original work [16] (**0.984 g/g** water). The retentate is mixed with methanol to produce OME feedstock. The permeate mass flow rate determines the remaining mass fraction of water in the retentate leaving the pervaporation unit (i.e., the produced OME feedstock). It influences both the heat demand and the required membrane surface in process IV and the subsequent OME process VII. In a sensitivity study, the water content in the OME feedstock was varied in both processes. The overall heat demand is calculated in process simulation; the required membrane surface area is calculated from the correlation given by Schmitz et al. [16]. All other process parameters besides the water content in the retentate are kept constant. Figure 6 gives the resulting trade-off between membrane area and heat demand.

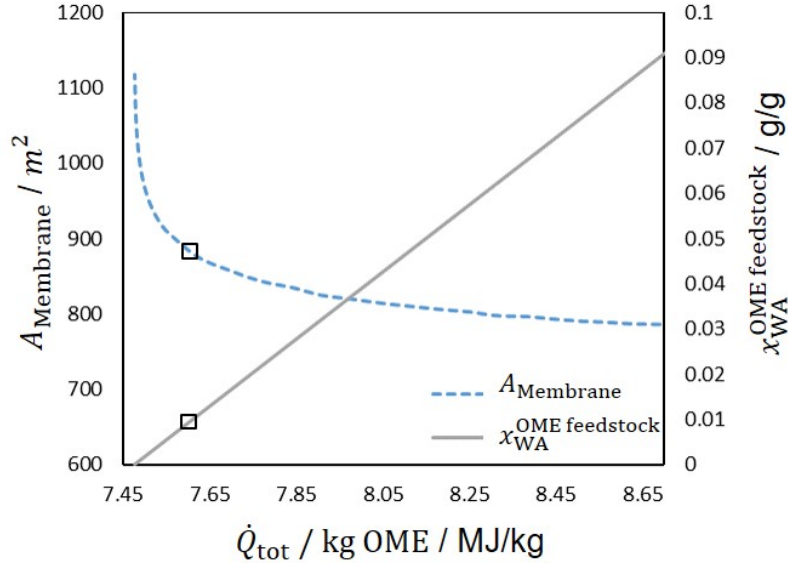

Figure 6: Membrane surface area and heat demand per kg OME in Process IV and in the OME process. The solid line shows the water fraction in the OME feedstock, and the dashed line the membrane surface area. The rectangles show the chosen operating point for the pervaporation unit.

The heat demand in the OME process increases significantly with higher water contents. This

is because water inhibits OME formation in the reactor, leading to bigger recycle streams. The operating point (OP) for the pervaporation unit is chosen at  $x_{WA}^{OME \text{ feedstock}}=0.01$  g/g where both area and heat demand are close to their minima. Lower water contents are not advisable as they would lead to drastically higher membrane surfaces areas while saving little heat.

Depending on the setup of the plant, multiple pervaporation units can be employed in sequence to achieve the required membrane surface. In this case, HX1 serves as an intermediate heater to keep the retentate/feed at a constant operating temperature. Currently, the required membranes are not manufactured on a large scale, and estimating the future costs based on the limited information is difficult. In this work, the membrane housing cost is estimated to 50  $\$/m^2$  and the membrane cost to 200  $\$/m^2$  [17, 13, 18]. Tables 15 to 16 give the stream table and unit data of the process for Route 2, tables 17 to 18 for Route 5 and tables 19 and 20 for Route 6.

Table 15: Stream Table Process IV, Route 2

| Stream             | 1       | 2      | 3            | 4            | 5      | 6            |
|--------------------|---------|--------|--------------|--------------|--------|--------------|
| $\dot{m}$ / kg/h   | 1252.31 | 636.45 | 615.85       | 615.85       | 373.65 | 1010.10      |
| $p$ / bar          | 1.00    | 1.00   | <b>0.03</b>  | 0.03         | 1.00   | 1.00         |
| $T/^\circ\text{C}$ | 65.61   | 65.61  | 65.61        | <b>25.00</b> | 25.00  | 25.00        |
| $x_i$ / g/g        |         |        |              |              |        |              |
| FA                 | 0.505   | 0.978  | <b>0.016</b> | 0.016        | -      | 0.616        |
| WA                 | 0.492   | 0.016  | <b>0.984</b> | 0.984        | -      | <b>0.010</b> |
| ME                 | 0.003   | 0.007  | -            | -            | 1.000  | 0.374        |

Table 16: Unit operations data Process IV, Route 2

| Unit: | $T/^\circ\text{C}$ | $p$ / bar | $\dot{Q}$ / kW |
|-------|--------------------|-----------|----------------|
| HX1   | 65.61              | 0.03      | 403.54         |
| CON1  | 25.00              | 0.03      | -428.48        |

Table 17: Stream Table Process IV, Route 5

| Stream             | 1       | 2      | 3            | 4            | 5      | 6            |
|--------------------|---------|--------|--------------|--------------|--------|--------------|
| $\dot{m}$ / kg/h   | 1233.93 | 885.56 | 348.37       | 348.37       | 124.54 | 1010.10      |
| $p$ / bar          | 1.00    | 1.00   | <b>0.03</b>  | 0.03         | 1.00   | 1.00         |
| $T/^\circ\text{C}$ | 69.50   | 69.50  | 69.50        | <b>25.00</b> | 25.00  | 25.00        |
| $x_i$ / g/g        |         |        |              |              |        |              |
| FA                 | 0.509   | 0.703  | <b>0.016</b> | 0.016        | -      | 0.616        |
| WA                 | 0.286   | 0.011  | <b>0.984</b> | 0.984        | -      | <b>0.010</b> |
| ME                 | 0.205   | 0.286  | -            | -            | 1.000  | 0.374        |

Table 18: Unit operations data Process IV, Route 5

| Unit:            | $T/^{\circ}\text{C}$ | $p / \text{bar}$ | $\dot{Q} / \text{kW}$ |
|------------------|----------------------|------------------|-----------------------|
| HX <sub>1</sub>  | 25.14                | 0.03             | 195.51                |
| CON <sub>1</sub> | 25.00                | 0.03             | -213.74               |

Table 19: Stream Table Process IV, Route 6

| Stream                  | 1      | 2      | 3            | 4            | 5      | 6            |
|-------------------------|--------|--------|--------------|--------------|--------|--------------|
| $\dot{m} / \text{kg/h}$ | 670.94 | 369.23 | 301.72       | 301.72       | 213.40 | 582.62       |
| $p / \text{bar}$        | 1.00   | 1.00   | <b>0.03</b>  | 0.03         | 1.00   | 1.00         |
| $T/^{\circ}\text{C}$    | 99.20  | 99.20  | 99.20        | <b>25.00</b> | 25.00  | 25.00        |
| $x_i / \text{g/g}$      |        |        |              |              |        |              |
| FA                      | 0.542  | 0.972  | <b>0.016</b> | 0.016        | -      | 0.616        |
| WA                      | 0.451  | 0.016  | <b>0.984</b> | 0.984        | -      | <b>0.010</b> |
| ME                      | 0.007  | 0.012  | -            | -            | 1.000  | 0.374        |

Table 20: Unit operations data Process IV, Route 6

| Unit:            | $T/^{\circ}\text{C}$ | $p / \text{bar}$ | $\dot{Q} / \text{kW}$ |
|------------------|----------------------|------------------|-----------------------|
| HX <sub>1</sub>  | 69.50                | 0.03             | 190.30                |
| CON <sub>1</sub> | 25.00                | 0.03             | -218.06               |

#### 1.1.6. Process V: Extractive distillation

A patent by Morishita et al. [19] suggests the production of gaseous FA of high purity from an aqueous FA solution via extractive distillation. Figure 7 shows the PFD of the process. Columns C2 and C3 and the compositions of their feed and product streams are adopted from the original work without changes; the recycle (6), column C1, evaporator E1, and absorber A1 were added in the present work. The compositions of the feed, top, and bottom products of the extractive distillation column as well as its size are adopted from the original literature. Aqueous FA solution (1) is pre-concentrated in distillation column C1, and pure water (0.997 g/g) is removed at the bottom of C1. The top product (2) contains 0.65 g/g FA [19] and is fed to the lower part of the extractive distillation column C2. In the upper part of the column, a large stream of polyethylene glycol dimethyl ether (PEG) is added as an extracting agent at a temperature of 120 °C. Column C2 is equipped with a reboiler operated at 170 °C; there is no condenser at the top. Pure gaseous FA is recovered from the top as stream (4). In order to produce OME-feedstock, we added a loss-free absorption of this gaseous FA in ME in absorber A1. Column C2's bottom product (5), comprised of PEG, water, and FA, is separated in column C3. We assume that PEG can be sharply separated from WA in distillation as bottom product (7) due to its low vapor pressure. Dilute aqueous FA solution (6) is removed at the top and recycled to convert all FA to OME feedstock. E1 evaporates and removes a small purge stream (8) to prevent an accumulation of small amounts of ME.

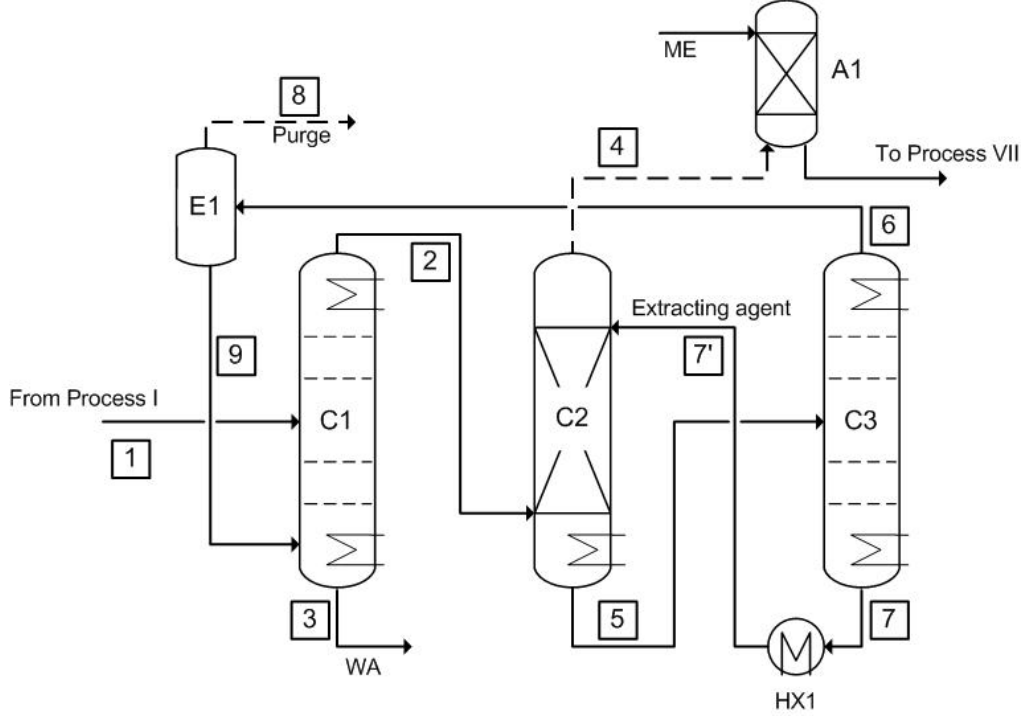

Figure 7: PFD of the extractive distillation process based on Morishita et al. [19].

There is no property model readily available for the extracting agent. However, since there is no PEG present in C1, E1, and A1, the energy demand of these units is calculated via process simulation using the described model for FA, ME, WA. The energy demand of column C2 is trivially calculated since it has no condenser and the material balance and the heat capacity of PEG are available. For column C3 the condenser duty  $\dot{Q}_C$  is estimated from the enthalpy of vaporization  $\Delta h_{v,i}(T)$  of the components of the top product, their mass flow rate  $\dot{m}_i$ , and the reflux ratio  $RR$ :

$$\dot{Q}_C = (RR + 1) \cdot \sum_{i=1}^N (\Delta h_{v,i}(T) \cdot \dot{m}_i) \quad (1)$$

The reflux ratio of C3 is estimated as 1.44 based on Underwood's equation using a relative volatility of WA/PEG of 230 [20]. The reboiler duty  $\dot{Q}_B$  is calculated via the energy balance of the whole column

$$\dot{Q}_B = \dot{H}_{\text{Bottom}} + \dot{H}_{\text{Top}} - \dot{H}_{\text{Feed}} - \dot{Q}_C \quad (2)$$

with  $\dot{H}_{\text{Bottom}}$ ,  $\dot{H}_{\text{Top}}$ ,  $\dot{H}_{\text{Feed}}$  being the enthalpy streams of bottom product, top product, and feed, respectively. Tables 21 to 23 give the stream table and unit data of the process.

Table 21: Stream Table Process V

| Stream           | 1       | 2            | 3            | 7'       | 4             | 5             | 6      | 7             | 8      | 9      | 10      |
|------------------|---------|--------------|--------------|----------|---------------|---------------|--------|---------------|--------|--------|---------|
| $\dot{m}$ / kg/h | 1251.19 | 1150.47      | 602.77       | 23009.42 | 623.15        | 23534.24      | 526.54 | 23009.42      | 24.50  | 502.05 | 1000.00 |
| $p$ / bar        | 6.00    | <b>6.00</b>  | <b>6.00</b>  | 2.00     | <b>2.00</b>   | <b>2.00</b>   | 2.00   | <b>2.00</b>   | 2.00   | 2.00   | 2.00    |
| $T$ / °C         | 65.94   | 137.60       | 158.63       | 120.00   | <b>120.00</b> | <b>170.00</b> | 113.38 | <b>170.00</b> | 114.92 | 114.92 | 110.00  |
| $x_i$ / g/g      |         |              |              |          |               |               |        |               |        |        |         |
| FA               | 0.504   | <b>0.650</b> | 0.003        | -        | <b>1.000</b>  | <b>0.005</b>  | 0.237  | -             | 0.328  | 0.236  | 0.623   |
| WA               | 0.492   | 0.318        | <b>0.997</b> | -        | -             | <b>0.017</b>  | 0.694  | -             | 0.511  | 0.700  | -       |
| ME               | 0.003   | 0.032        | -            | -        | -             | -             | 0.069  | -             | 0.161  | 0.064  | 0.377   |
| PEG              | -       | -            | -            | 1.000    | -             | <b>0.978</b>  | -      | <b>1.000</b>  | -      | -      | -       |

Table 22: Unit operations data Process V

| Unit:           | $T$ / °C | $p$ / bar | $\dot{Q}$ / kW |
|-----------------|----------|-----------|----------------|
| E <sub>1</sub>  | 114.92   | 2.00      | 12.37          |
| HX <sub>1</sub> | 120.00   | 2.00      | -694.92        |
| A <sub>1</sub>  | 110.00   | 6.00      | -251.98        |
| HX <sub>2</sub> | 40.00    | 1.00      | -391.52        |

Table 23: Columns Process V

| Distillation colmns  | C <sub>1</sub> | C <sub>2</sub> | C <sub>3</sub> |
|----------------------|----------------|----------------|----------------|
| $\dot{Q}_{top}$ / kW | -1285.78       | -              | -417.13        |
| $T_{top}$ / °C       | 137.60         | -              | 113.38         |
| $\dot{Q}_{bot}$ / kW | 1468.70        | 992.10         | 348.69         |
| $T_{bot}$ / °C       | 158.63         | <b>170.00</b>  | <b>170.00</b>  |
| N                    | 24.00          | <b>49.00</b>   | <b>43.00</b>   |
| N <sup>Feed</sup>    | 11.00          | -              | -              |
| N <sup>Feed(9)</sup> | 20.00          | -              | -              |
| $p$ / bar            | <b>6.00</b>    | <b>2.00</b>    | <b>2.00</b>    |
| RR                   | 1.42           | -              | 1.44           |



### 1.1.7. Process VI: Chemical separation of water and extractive distillation

A process proposed by Masamoto et al. [21] is based on the production of the intermediate MAL in order to remove pure WA. Figure 8 gives the PFD of the process.

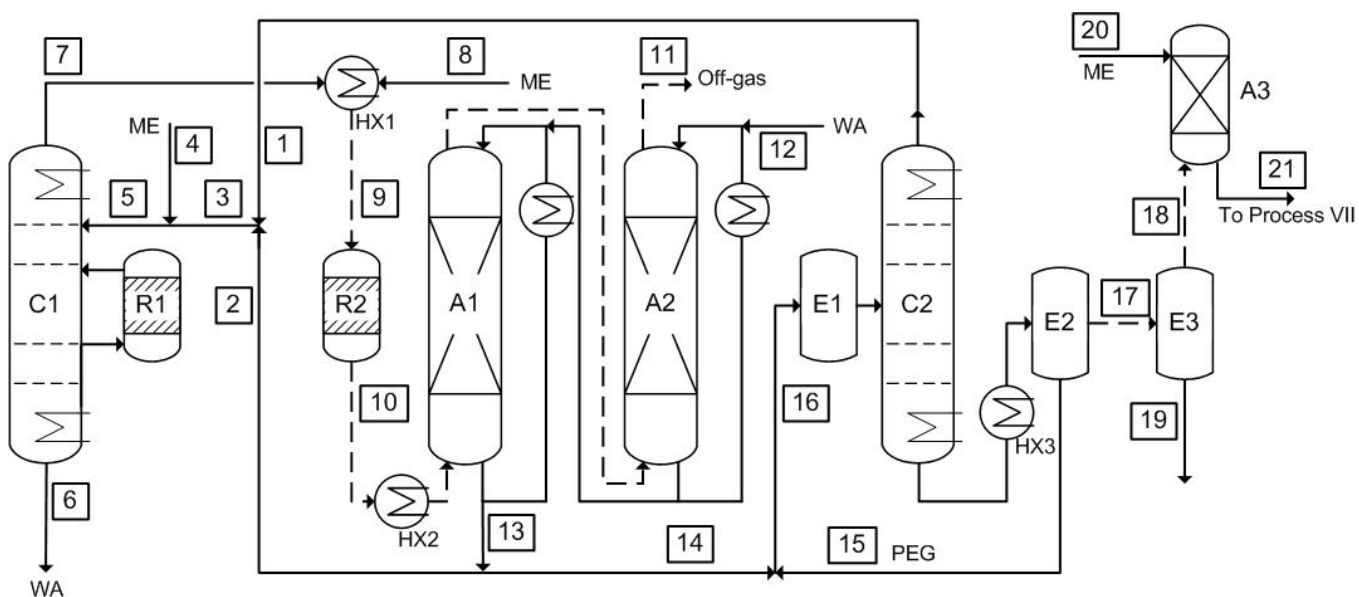

Figure 8: PFD of process proposed by Masamoto et al.

An aqueous solution of 0.39 g/g FA (3) produced in this process is mixed with ME (4) and fed to distillation column C1 as stream (5). Sidestreams of C1 are fed to three reactors (only one reactor shown, cf. R1), where MAL is formed and recycled to the column and subsequently removed at the top as stream (7) (0.90 g/g MAL 0.1 g/g ME). Pure water is removed as bottom product (6). Stream (7) is combined with air (8) and fed to reactor R2 to produce FA. The reactor product (10) is absorbed in absorption columns A1 and A2 to produce a concentrated aqueous solution of 0.65 g/g FA (13). Part of stream (13) is recycled as stream (2).

The other part (14) is mixed with an extracting agent (PEG) (15) in the stirred vessel E1 and subsequently fed to column C2. In C2, a dilute aqueous FA solution of 27% FA is removed as the top product (1) and recycled. The bottom product of C2 is fed to the flash vessel E2, where pure PEG is recovered as a liquid product (15). The gaseous product (17) is fed to cooling trap E3, where pure FA gas is removed as stream (18), and small amounts of water and ME are removed as stream (19). The gaseous FA is absorbed in ME in Absorber A3 to produce OME feedstock. The recycled streams (2) and (1) form the aqueous FA solution (3) that is part of the feed. The absorbers A1 and A2 are modeled with 3 and 4 vapor-liquid equilibrium (VLE) stages, respectively. A liquid solution is drawn at the bottom of each absorber, cooled, and recycled to its top. The

distillation column C1 is simulated rigorously using the described property model. The adiabatic reactors ascribed to it are modeled considering the chemical equilibrium reactions 6 and 9 in the main manuscript and the formation of MAL from FA and ME [22]. They draw and recycle solutions at stages 15, 18, and 21. Due to missing property data for PEG, column C2 is not simulated, but its heat demand is estimated based on the enthalpy of vaporization of the top product, the top and bottom product mass flow rates  $\dot{m}_i$ , and the reflux ratio, cf. section 1.1.6 for details. A reflux ratio of 1.4 was assumed. All stream compositions are adopted from the original work [21], tables 24 to 25 give the stream table and unit data of the process.

Table 24: Stream Table Process VI

| Stream           | 1            | 2      | 3      | 4      | 5       | 6            | 7            | 8            | 9       | 10           | 11           | 12           | 13           | 14      | 15      | 16      | 17           | 18           | 19    | 20     | 21      |
|------------------|--------------|--------|--------|--------|---------|--------------|--------------|--------------|---------|--------------|--------------|--------------|--------------|---------|---------|---------|--------------|--------------|-------|--------|---------|
| $\dot{m}$ / kg/h | 539.51       | 242.41 | 781.92 | 735.60 | 1510.61 | 655.24       | 858.02       | 7614.94      | 8472.96 | 8472.96      | 7560.47      | 497.90       | 1410.40      | 1167.99 | 1594.82 | 3720.44 | 628.48       | 611.92       | 16.56 | 388.08 | 1000.00 |
| $p$ / bar        | 1.00         | 1.00   | 1.00   | 1.00   | 1.00    | 1.00         | 1.00         | 1.00         | 1.00    | 1.00         | 1.00         | 2.00         | 1.00         | 1.00    | 1.00    | 1.00    | 1.00         | 1.00         | 1.00  | 1.00   | 1.00    |
| $T$ / °C         | 56.33        | 67.30  | 59.99  | 25.00  | 59.86   | 99.62        | 41.58        | 25.00        | 40.00   | 340.00       | 39.98        | 25.00        | 67.30        | 67.30   | 140.00  | 96.47   | 140.00       | -            | -     | 25.00  | 25.00   |
| $x_i$ / g/g      |              |        |        |        |         |              |              |              |         |              |              |              |              |         |         |         |              |              |       |        |         |
| FA               | <b>0.273</b> | 0.650  | 0.390  | -      | 0.202   | 0.001        | -            | -            | -       | <b>0.111</b> | <b>0.003</b> | -            | <b>0.650</b> | 0.650   | -       | 0.372   | <b>0.973</b> | <b>0.999</b> | -     | -      | 0.612   |
| WA               | 0.718        | 0.346  | 0.602  | -      | 0.311   | <b>0.999</b> | -            | <b>0.013</b> | 0.011   | <b>0.039</b> | 0.045        | <b>1.000</b> | <b>0.346</b> | 0.346   | -       | 0.196   | 0.026        | -            | 0.998 | -      | -       |
| ME               | 0.009        | 0.004  | 0.008  | 1.000  | 0.487   | -            | <b>0.101</b> | -            | 0.010   | <b>0.003</b> | 0.002        | -            | 0.004        | 0.004   | -       | 0.003   | -            | -            | 1.000 | 0.388  | -       |
| CO <sub>2</sub>  | -            | -      | -      | -      | -       | -            | -            | -            | -       | -            | -            | -            | -            | -       | -       | -       | -            | -            | -     | -      | -       |
| N <sub>2</sub>   | -            | -      | -      | -      | -       | -            | -            | <b>0.897</b> | 0.807   | 0.807        | 0.904        | -            | -            | -       | -       | -       | 0.001        | 0.001        | -     | -      | -       |
| O <sub>2</sub>   | -            | -      | -      | -      | -       | -            | -            | <b>0.090</b> | 0.081   | 0.037        | 0.042        | -            | -            | -       | -       | -       | -            | -            | -     | -      | -       |
| H <sub>2</sub>   | -            | -      | -      | -      | -       | -            | -            | -            | -       | -            | -            | -            | -            | -       | -       | -       | -            | -            | -     | -      | -       |
| CO               | -            | -      | -      | -      | -       | -            | -            | -            | -       | 0.003        | 0.003        | -            | -            | -       | -       | -       | -            | -            | -     | -      | -       |
| MAL              | -            | -      | -      | -      | -       | -            | <b>0.899</b> | -            | 0.091   | <b>0.001</b> | 0.001        | -            | -            | -       | -       | -       | -            | -            | 0.002 | -      | -       |
| PEG              | -            | -      | -      | -      | -       | -            | -            | -            | -       | -            | -            | -            | -            | -       | 1.000   | 0.768   | -            | -            | -     | -      | -       |

Table 25: Unit operations data Process VI

| Unit:             | $T$ / °C | $p$ / bar | $\dot{Q}$ / kW | Distillation columns |                |
|-------------------|----------|-----------|----------------|----------------------|----------------|
|                   |          |           |                | C <sub>1</sub>       | C <sub>2</sub> |
| HX <sub>1,1</sub> | 140.00   | 1.00      | 71.44          | -321.59              | -340.30        |
| HX <sub>3,1</sub> | 40.00    | 1.00      | 137.78         | 41.58                | 56.33          |
| R <sub>2</sub>    | 340.00   | 1.00      | 41.85          | 306.88               | 325.71         |
| E <sub>1</sub>    | 79.98    | 1.00      | -57.82         | 99.62                | 79.98          |
| E <sub>2</sub>    | 79.98    | 1.00      | 353.97         | 1.00                 | 1.00           |
| E <sub>3</sub>    | 0.00     | 1.00      | -42.06         | 32.00                | <b>10</b>      |
| A <sub>1</sub>    | 67.30    | 1.00      | 510.71         | 15.00                | <b>1</b>       |
| A <sub>2</sub>    | 39.98    | 1.00      | -750.91        | 2.05                 | 1.40           |
| A <sub>3</sub>    | 25.00    | 1.00      | -418.61        |                      |                |

### 1.1.8. Process VII: OME production

The OME production process is adopted from Schmitz et al. [23]. All compositions and mass flow rates are adopted without modifications, Figure 9 gives a PFD.

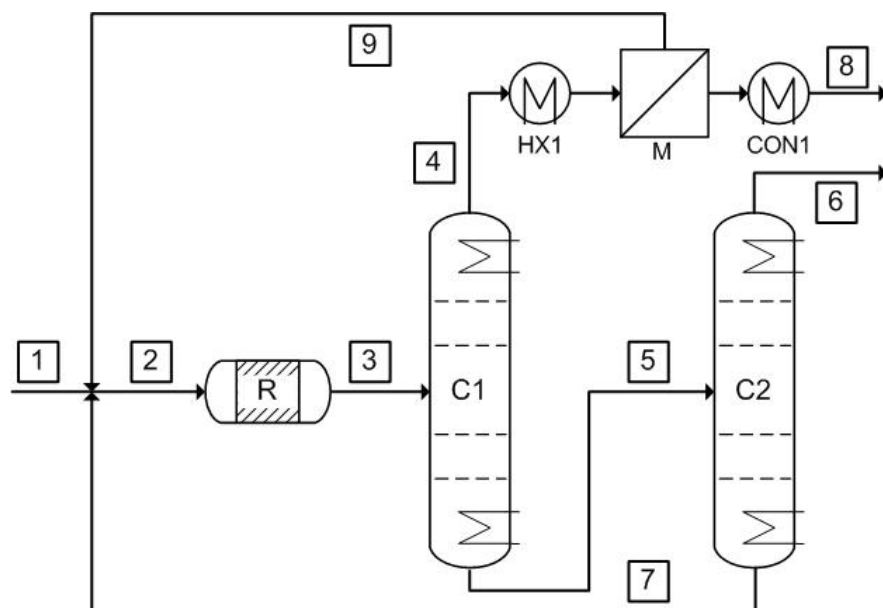

Figure 9: PFD of the OME process proposed by Schmitz et al. [23].

The OME feedstock is mixed with the recycle streams 7 and 9 and fed to the isothermic reactor R. R is operated at 68 °C and 2 bar and is filled with Amberlyst 46 as a catalyst. 0.277 kg of catalyst is required per kg of produced OME<sub>3-5</sub> per hour. The reactor product (3) is fed to distillation column C1, where OME<sub>3</sub> and all longer chained OME are yielded in the bottom product. The bottom product (5) is fed to column C2, where all OME<sub>n>5</sub> is separated as the bottom product (7) and recycled, the top product (6) is the product OME<sub>3-5</sub>. The top product of C1 (4) is fed to a pervaporation unit M1 to remove pure water (8) as permeate. The retentate (9) is recycled to the reactor. Tables 26 to 28 give the stream table and unit data of the process. Note that the process data is given exemplary for route 4, where 0.10 g/g of water is present in the OME Feedstock. However, the OME process has been simulated with the corresponding amount of water in the feed for every route.

| Table 26: Stream Table Process VII |         |             |             |              |              |              |              |        |              |
|------------------------------------|---------|-------------|-------------|--------------|--------------|--------------|--------------|--------|--------------|
| Stream                             | 1       | 2           | 3           | 4            | 5            | 6            | 7            | 8      | 9            |
| $\dot{m}$ / kg/h                   | 1111.10 | 8101.00     | 8100.99     | 7145.08      | 955.92       | 893.78       | 62.13        | 217.31 | 6927.77      |
| $p$ / bar                          | 1.00    | <b>2.00</b> | <b>2.00</b> | <b>1.40</b>  | <b>1.40</b>  | <b>0.10</b>  | <b>0.10</b>  | 1.40   | 1.40         |
| $T$ / °C                           | 70.00   | 68.51       | 68.00       | 68.27        | 184.97       | 96.41        | 202.71       | 68.27  | 68.27        |
| $x_i$ / g/g                        |         |             |             |              |              |              |              |        |              |
| FA                                 | 0.560   | 0.207       | 0.130       | 0.148        | -            | -            | -            | -      | 0.152        |
| WA                                 | 0.100   | 0.018       | 0.031       | 0.036        | -            | -            | -            | 1.000  | <b>0.005</b> |
| ME                                 | 0.340   | 0.153       | 0.106       | 0.120        | -            | -            | -            | -      | 0.124        |
| MAL                                | -       | 0.393       | 0.393       | 0.445        | -            | -            | -            | -      | 0.459        |
| OME <sub>2</sub>                   | -       | 0.195       | 0.195       | 0.221        | -            | -            | -            | -      | 0.228        |
| OME <sub>3</sub>                   | -       | 0.027       | 0.086       | <b>0.030</b> | <b>0.502</b> | 0.536        | -            | -      | 0.031        |
| OME <sub>4</sub>                   | -       | -           | 0.036       | -            | 0.302        | 0.323        | -            | -      | -            |
| OME <sub>5</sub>                   | -       | -           | 0.014       | -            | 0.121        | 0.129        | -            | -      | -            |
| OME <sub>6</sub>                   | -       | 0.004       | 0.006       | -            | 0.047        | <b>0.011</b> | <b>0.567</b> | -      | -            |
| OME <sub>7</sub>                   | -       | 0.002       | 0.002       | -            | 0.018        | -            | 0.276        | -      | -            |
| OME <sub>8</sub>                   | -       | 0.001       | 0.001       | -            | 0.007        | -            | 0.104        | -      | -            |
| OME <sub>9</sub>                   | -       | -           | -           | -            | 0.003        | -            | 0.039        | -      | -            |
| OME <sub>10</sub>                  | -       | -           | -           | -            | 0.001        | -            | 0.014        | -      | -            |

Table 27: Unit operations data Process VII

| Unit:            | $T$ / °C | $p$ / bar | $\dot{Q}$ / kW |
|------------------|----------|-----------|----------------|
| R                | 68.00    | 2.00      | -39.06         |
| HX <sub>1</sub>  | 68.27    | 1.40      | 114.64         |
| CON <sub>1</sub> | 5.46     | 0.03      | -157.08        |

| Table 28: Columns Process VII |                |                |
|-------------------------------|----------------|----------------|
| Distillation columns          | C <sub>1</sub> | C <sub>2</sub> |
| $\dot{Q}_{top}$ / kW          | -1597.75       | -162.49        |
| $T_{top}$ / °C                | 68.27          | 96.41          |
| $\dot{Q}_{bot}$ / kW          | 1656.66        | 119.21         |
| $T_{bot}$ / °C                | 184.97         | 202.71         |
| $p$ / bar                     | <b>1.40</b>    | <b>0.10</b>    |
| N                             | 13.00          | 13.00          |
| N <sup>Feed</sup>             | 7.00           | 6.00           |

## 2. Model of physico-chemical properties

### 2.1. FA production and concentration

Correlations for the vapor pressures (MAL[24], FA[24], MG<sub>n</sub>[24], HF<sub>n</sub>[24], WA[24]) were adopted from literature. The same holds for enthalpies of vaporization (FA[25], MAL [25], ME[26], WA[26], FA [26]) and the ideal gas heat capacities (FA[25], MAL [25], ME [26], WA[26], FA [26]). Enthalpies of formation are adopted from the literature as well (FA[25], MAL[25], ME[24], WA[24]). The UNIFAC parameters of the activity model for the system WA, FA, ME, MG, HF, MAL are adopted from Kuhnert et al. [24]. The activity-based equilibrium constants  $K_a$  of the formation of MG<sub>n</sub> and HF<sub>n</sub> are adopted from Kuhnert et al. [24]. For thin-film evaporators, the reaction kinetics in the liquid phase are modeled as described by Ott et al. [22]. For the noncondensable gases N<sub>2</sub>, O<sub>2</sub>, CO, CO<sub>2</sub>, H<sub>2</sub>, property data for vapor pressures, enthalpies of formation in the gas phase, enthalpies of vaporization, ideal gas heat capacities are adopted from the DIPPR database [25]. Gas solubilities are neglected for these components. We found no consistent enthalpy model readily available for the MG<sub>n</sub> and HF<sub>n</sub>. Therefore one is derived based on their vapor pressure and the activity-based equilibrium constants  $K_a$  of the formation of MG<sub>n</sub> and HF<sub>n</sub> [24]. A similar procedure to the following for the derivation of this enthalpy model has already been described by Bongartz et al. [27].

All specific enthalpies are normalized to the enthalpy of formation  $h_i^f(T^\theta)$  in the gaseous state at standard temperature  $T^\theta$  and are calculated based on the following equations :

$$h_i(T_1) = h_i^f(T^\theta) + \int_{T^\theta}^{T_1} c_{p,i}^g dT \quad (3)$$

for gasous streams, and

$$h_i(T_1) = h_i^f(T^\theta) + \int_{T^\theta}^{T_1} c_{p,i}^g dT - \Delta h_{v,i}(T_1) \quad (4)$$

for liquid streams. Pressure dependence of the enthalpies is neglected.  $c_{p,i}^l$  and  $c_{p,i}^g$  are the isobaric, specific heat capacities in the liquid and gaseous phase, respectively.  $\Delta h_{v,i}$  denotes the enthalpy of vaporization.

The enthalpy of vaporization of MG<sub>1</sub> and HF<sub>1</sub> is estimated from their vapor pressure via the Clausius Clapeyron equation assuming an ideal gas phase and negligible liquid volume

$$\frac{1}{p} dp = \frac{\Delta h_{v,i}}{RT^2} dT. \quad (5)$$

The reaction enthalpies  $\Delta_R h(T)$  of Reactions (1)-(4) in the main article for the formation of MG/HF in the liquid phase are calculated from the respective equilibrium constant  $K_a$  via the Van-'t-Hoff-equation:

$$\left( \frac{\partial \ln K_a}{\partial T} \right) = \frac{\Delta_R h(T)}{RT^2}. \quad (6)$$

The specific enthalpies of all MG/HF species in the liquid phase

$$h_{\text{MG}_n}^{\text{liq}}(T) = \Delta_R^{\text{liq}} h_{\text{MG}_n}(T) + h_{\text{MG}_{n-1}}^{\text{liq}}(T) + h_{\text{FA}}^{\text{liq}}(T) \quad (7)$$

(HF analogously) and the enthalpies of  $\text{MG}_1$  and  $\text{HF}_1$  in the gaseous phase are calculated for multiple temperatures in the range of 298.15 K to 415.15 K. This also yields the standard enthalpies of formation (at 298.15 K) for  $\text{MG}_1$  and  $\text{HF}_1$  in the gaseous phase and  $\text{MG}/\text{HF}_{n_i1}$  in the liquid phase. Heat capacities are fitted for  $\text{MG}_1$  and  $\text{HF}_1$  in the gaseous phase and  $\text{MG}/\text{HF}_{n_i1}$  in the liquid phase so that the enthalpies in the temperature range can be calculated using Eq. (4) instead of Eq. (7). The heat capacities are fitted to a polynomial that meets the required input format of Aspen:

$$c_p/\text{J/molK} = A + BT + CT^2 + DT^3 + ET^4. \quad (8)$$

The enthalpies of  $\text{MG}/\text{HF}_{n_i1}$  in the gas phase are not required since they are assumed to be always liquid due to their very low vapor pressure. The critical temperatures  $T_c(\text{MG}_1)$  and  $T_c(\text{HF}_1)$  are estimated with the method of Lyderson. Parameters for all used correlations are given in the first author's dissertation [10].

## 2.2. Property data Process VII

The property model used for the OME process is adopted from Schmitz [28], which has slight differences to the model used in process I-VI.

## 3. Assumptions Techno-Economic Assessment

Tables 29 to 32 give the assumption and sources for the Techno-Economic Assessment of Routes 1-7.

Table 29: Factors for CAPEX and OPEX estimation based on Peters et al. [29].

| <b>Factors for CAPEX estimation</b> | Factor | Basis    |
|-------------------------------------|--------|----------|
| <i>Direct Investment Costs</i>      |        |          |
| Equipment costs                     | 1      | EQ costs |
| Installation                        | 0.47   | EQ costs |
| Instrumentation and controls        | 0.36   | EQ costs |
| Piping                              | 0.68   | EQ costs |
| Electrical systems                  | 0.11   | EQ costs |
| Buildings                           | 0.18   | EQ costs |
| Yard improvements                   | 0.1    | EQ costs |
| Service facilities                  | 0.7    | EQ costs |
| <i>Indirect Investment Costs</i>    |        |          |
| Engineering and supervision         | 0.33   | EQ costs |
| Construction expenses               | 0.41   | EQ costs |
| Legal expenses                      | 0.04   | EQ costs |
| Contractor's fee                    | 0.22   | EQ costs |
| Contingency                         | 0.44   | EQ costs |
| Fixed Capital Investment (FCI)      | 5.04   | EQ costs |
| Working Capital (% of TCI)          | 15%    | TCI      |
| Total Capital Investment (TCI)      | 5.93   | EQ costs |
| <b>Factors for OPEX estimation</b>  |        |          |
| <i>Direct Operating Costs</i>       |        |          |
| Insurance and taxes                 | 0.02   | FCI      |
| Maintenance labor (ML)              | 0.01   | FCI      |
| Maintenance material (MM)           | 0.01   | FCI      |
| Operating supplies (OS)             | 0.15   | ML+MM    |
| Operating supervision (OV)          | 0.15   | OL       |
| Laboratory charges                  | 0.2    | OL       |
| Plant overhead costs (PO)           | 0.5    | OL+OV+OS |
| Administrative costs                | 0.25   | PO       |
| Distribution and selling costs      | 0      | NPC      |
| Research and development costs      | 0      | NPC      |



Table 30: Further boundary conditions for economic estimation and further estimation factors

|                                              | Value       | Base                         | Reference |
|----------------------------------------------|-------------|------------------------------|-----------|
| <b>Economic Parameters</b>                   |             |                              |           |
| Reference year                               | 2018        |                              |           |
| Operating hours per year                     | 8000        |                              |           |
| Depreciation period in years                 | 20          |                              |           |
| WACC                                         | 0.05        |                              |           |
| Annuity                                      | 0.08        | FCI                          |           |
| <b>Material Factors</b>                      |             |                              |           |
| Carbon steel                                 | 1           |                              | [29]      |
| Aluminium and bronze                         | 1.07        | Carbon steel Equipment       | [29]      |
| Cast steel                                   | 1.1         | Carbon steel Equipment       | [29]      |
| 304 stainless steel                          | 1.3         | Carbon steel Equipment       | [29]      |
| 316 stainless steel                          | 1.3         | Carbon steel Equipment       | [29]      |
| 321 stainless steel                          | 1.5         | Carbon steel Equipment       | [29]      |
| Hastelloy C                                  | 1.55        | Carbon steel Equipment       | [29]      |
| Monel                                        | 1.65        | Carbon steel Equipment       | [29]      |
| Nickel and Inconel                           | 1.7         | Carbon steel Equipment       | [29]      |
| <b>Location Factors</b>                      |             |                              |           |
| United States Gulf Coast                     | 1           |                              | [29]      |
| Germany                                      | 1.11        | Equipment cost US Gulf Coast | [29]      |
| <b>Chemical Engineering Plant Cost Index</b> |             |                              |           |
| Jan 10                                       | 532.9       |                              | [30]      |
| 2018                                         | 603.1       |                              | [30]      |
| 2019                                         | 607.5       |                              | [30]      |
| <b>Exchange Rate</b>                         |             |                              |           |
| EUR/USD (2018)                               | 0.846383808 |                              | [31]      |

Table 31: Direct Costs for OPEX estimation

|                               | Value   | Unit    | Reference            |
|-------------------------------|---------|---------|----------------------|
| <b>Raw Materials</b>          |         |         |                      |
| Methanol                      | 401.75  | EUR/t   | [32]                 |
| Water                         | 1       | EUR/t   | Own assumption       |
| Air                           | 0       |         | Own assumption       |
| <b>Utility Costs</b>          |         |         |                      |
| Power                         | 50      | EUR/MWh | Own assumption       |
| Natural gas                   | 28.2    | EUR/MWh | [33]                 |
| Cooling water                 | 0.005   | EUR/kWh | Own assumption       |
| Steam 4 bar, 150°C            | 22.8    | EUR/t   | Based on Turton [34] |
| Steam 20 bar, 220 °C          | 23.1    | EUR/t   | Based on Turton [34] |
| Steam 70 bar, 290 °C          | 23.5    | EUR/t   | Based on Turton [34] |
| Cooled water                  | 0.0075  | EUR/kWh | Own assumption       |
| Cooling Agent (Salt Solution) | 0.015   | EUR/kWh | Own assumption       |
| <b>Consumables</b>            |         |         |                      |
| Catalyst                      | 700     | EUR/kg  | Own assumption       |
| Extraction agent              | 2996.19 | EUR/t   | [21]                 |
| <b>Labor costs</b>            |         |         |                      |
| Hourly wages                  | 41.91   | EUR/h   | Own assumption       |

Table 32: Heat Transfer coefficients[35]

| Type                                                       | Value | Unit               |
|------------------------------------------------------------|-------|--------------------|
| <b>Shell-and-tube heat exchangers</b>                      |       |                    |
| - without phase change -                                   |       |                    |
| Gas (1 bar) inside - Gas ( 1 bar) outside                  | 20    | W/m <sup>2</sup> K |
| Gas (200 bar ) inside - Gas ( 200 bar) outside             | 325   | W/m <sup>2</sup> K |
| Liquid - Gas (1 bar)                                       | 42.5  | W/m <sup>2</sup> K |
| Gas, high pressure (200 bar) inside - Liquid outside       | 300   | W/m <sup>2</sup> K |
| Liquid inside - Liquid outside                             | 625   | W/m <sup>2</sup> K |
| Superheated steam outside - Liquid inside                  | 750   | W/m <sup>2</sup> K |
| - Evaporator -                                             |       |                    |
| Natural circulation - low viscosity                        | 600   | W/m <sup>2</sup> K |
| Natural circulation - high viscosity                       | 1250  | W/m <sup>2</sup> K |
| Forced circulation                                         | 2000  | W/m <sup>2</sup> K |
| - Condenser -                                              |       |                    |
| Cooling water inside - Steam outside                       | 750   | W/m <sup>2</sup> K |
| <b>Waste heat boiler</b>                                   |       |                    |
| Gas inside - Boiling water outside                         | 32.5  | W/m <sup>2</sup> K |
| <b>Double pipe</b>                                         |       |                    |
| Gas (1 bar) inside - Gas ( 1 bar) outside                  | 22.5  | W/m <sup>2</sup> K |
| Gas (200 bar) inside - Gas ( 1 bar) outside                | 40    | W/m <sup>2</sup> K |
| Gas (200 bar ) inside - Gas ( 200 bar) outside             | 325   | W/m <sup>2</sup> K |
| Gas, high pressure (200 bar) inside - Liquid outside       | 400   | W/m <sup>2</sup> K |
| Liquid inside - Liquid outside                             | 850   | W/m <sup>2</sup> K |
| <b>Plate heat exchanger</b>                                |       |                    |
| Flat channels — Gas - Water                                | 40    | W/m <sup>2</sup> K |
| Flat channels — Liquid - Water                             | 575   | W/m <sup>2</sup> K |
| Profile plates — Liquid - Liquid                           | 2500  | W/m <sup>2</sup> K |
| <b>Cooling</b>                                             |       |                    |
| Min temperature Difference                                 | 27    | 10 K               |
| <b>Heating</b>                                             |       |                    |
| Steam Network available                                    |       |                    |
| Boiling Water at pressure level of steam network available |       |                    |

## Abbreviations

|                  |                                                     |
|------------------|-----------------------------------------------------|
| A                | Absorber                                            |
| B                | Burner                                              |
| C                | Column                                              |
| CAPEX            | Capital Expenditure                                 |
| CEPCI            | Chemical Engineering Plant Cost Index               |
| CON              | Condenser                                           |
| DME              | Dimethylether                                       |
| E                | Various unit operations with phase change           |
| FA               | Formaldehyde                                        |
| HF <sub>n</sub>  | Poly(oxymethylene) hemiformal                       |
| HX               | Heat exchanger                                      |
| LPC              | Levelized product cost                              |
| M                | Membrane Unit                                       |
| MAL              | Methylal                                            |
| MCO              | Multi-criteria optimization                         |
| ME               | Methanol                                            |
| MG <sub>n</sub>  | Poly(oxymethylene) glycol                           |
| OME <sub>n</sub> | Poly(oxymethylene) dimethyl ether of chain length n |
| OP               | Operating point                                     |
| OPEX             | Operational Expenditure                             |
| PEG              | Polyethylene glycol dimethyl ether                  |
| PFD              | Process flow diagram                                |
| R                | Reactor                                             |
| RR               | Reflux Ratio                                        |
| SI               | Supporting Information                              |
| TFE              | Thin Film Evaporator                                |
| TRI              | Trioxane                                            |
| TRL              | Technology Readiness Level                          |
| VLE              | Vapor-liquid equilibrium                            |
| WA               | Water                                               |
| WACC             | Weighted Average Cost of Capital                    |

## Variables

|                  |                                               |
|------------------|-----------------------------------------------|
| $A$              | Surface                                       |
| $c$              | Cost                                          |
| $c_p$            | Isobaric heat capacity                        |
| $\Delta h_{v,i}$ | Enthalpy of vaporization                      |
| $\Delta h_{R,i}$ | Reaction enthalpy                             |
| $H$              | Enthalpy                                      |
| $h_i$            | Specific enthalpy of component i              |
| $h_i^f$          | Standard enthalpy of formation of component i |
| $K$              | Number of components                          |
| $k$              | Heat transfer coefficient                     |
| $\dot{m}$        | Mass flow rate                                |
| $N$              | Number of stages                              |
| $n$              | Chain length                                  |
| $p$              | pressure                                      |
| $\dot{Q}_i$      | Heat duty of unit i                           |
| $\dot{Q}_{tot}$  | Total heat duty                               |
| $R$              | Universal gas constant                        |
| $T$              | Temperature                                   |
| $T_c$            | Critical temperature                          |
| $x_i^k$          | Mass fraction of component i in k             |

## Acknowledgements

This study was carried out in the framework of the E2Fuels project (project no.: 03EIV011G) funded by the German Federal Ministry for Economic Affairs and Energy. The financial support is gratefully acknowledged.

The authors acknowledge the cooperation within the Network TUM.Hydrogen and PtX.

## References

- [1] G. Reuss, W. Disteldorf, A. O. Gamer, A. Hilt, Formaldehyde, in: Ullmann's Encyclopedia of Industrial Chemistry, Wiley-VCH Verlag GmbH & Co. KGaA, Weinheim, Germany, 2000.
- [2] V. Schröder, Explosionsgrenzen von Wasserstoff und Wasserstoff/Methan-Gemischen, Tech. rep., Bundesanstalt für Materialforschung und -prüfung (BAM) (2002).
- [3] X. Liu, Y. Huang, Y. Wang, Q. Zhang, Critical explosible oxygen concentration of methanol-saturated vapor/O<sub>2</sub>/N<sub>2</sub> mixtures at elevated temperatures and pressures, Industrial and Engineering Chemistry Research 53 (13) (2014) 5617–5621. doi:10.1021/ie402502j.
- [4] M. Qian, M. A. Liauw, G. Emig, Formaldehyde synthesis from methanol over silver catalysts, Applied Catalysis A: General 238 (2) (2003) 211–222. doi:10.1016/S0926-860X(02)00340-X.
- [5] L. Eek Vancells, Method for producing stabilized solutions of formaldehyde with methanol. Patent EP0434783B1 (1990).
- [6] D. L. Kloepper, L. G. Stevenson, Method for making alcoholformaldehyde product. Patent US3214891A (sep 1965).
- [7] E. Ströfer, N. Lang, U. Lichtfers, U. Steinbrenner, H. Hasse, Separation of liquid mixtures in a film evaporator. Patent US7414159B2 (mar 2003).
- [8] E. Ströfer, T. Gruetzner, H. Hasse, N. Lang, M. Ott, Verfahren zur erzeugung hochkonzentrierter formaldehydlösungen. Patent WO2004078678A3 (2003).
- [9] K. Schilling, M. Sohn, E. Ströfer, H. Hasse, Reaktive Verdampfung formaldehydhaltiger Mischungen und Process Monitoring mit Online-NMR-Spektroskopie, Chemie Ingenieur Technik 75 (3) (2003) 240–244. doi:10.1002/cite.200390047.
- [10] Y. Tönges, Advances in the production of poly(oxymethylene) dimethyl ethers and methanolic formaldehyde solution, Phd thesis, Technical University of Munich (2022).
- [11] F. Mantel, R. E. Ali, C. Baensch, S. Voelker, P. Haltenort, J. Burger, R.-U. Dietrich, N. Von Der Assen, A. Schaadt, J. Sauer, O. Salem, Techno-economic assessment and Carbon footprint of processes for the large-scale production of Oxymethylene Dimethyl Ethers from Carbon Dioxide and Hydrogen, Sustainable Energy & Fuels 6 (2021) 528–549. doi:10.1039/D1SE01270C.
- [12] U. Sander, P. Soukup, Design and operation of a pervaporation plant for ethanol dehydration, Journal of Membrane Science 36 (1988) 463–475. doi:https://doi.org/10.1016/0376-7388(88)80036-X.

- [13] B. K. Srinivas, M. M. El-Halwagi, Optimal design of pervaporation systems for waste reduction, *Computers & Chemical Engineering* 17 (10) (1993) 957–970. doi:[https://doi.org/10.1016/0098-1354\(93\)80077-Z](https://doi.org/10.1016/0098-1354(93)80077-Z).
- [14] A. Dams, A. Fried, F. Hammann, Verfahren zur Gewinnung konzentrierter wäßriger Formaldehydlösungen durch Pervaporation. Patent DE4337231A1 (1993).
- [15] H. Vandenmersch, T. Sirch, C. Hittinger, E. Danz, Verfahren zur Herstellung von alkoholischen Formaldehydlösungen mittels Membrantrennverfahren. Patent DE10004562A1 (feb 2000).
- [16] N. Schmitz, C. F. Breitzkreuz, E. Ströfer, J. Burger, H. Hasse, Separation of water from mixtures containing formaldehyde, water, methanol, methylal, and poly(oxymethylene) dimethyl ethers by pervaporation, *Journal of Membrane Science* 564 (2018) 806–812. doi:[10.1016/j.memsci.2018.07.053](https://doi.org/10.1016/j.memsci.2018.07.053).
- [17] L. M. Vane, F. R. Alvarez, Effect of membrane and process characteristics on cost and energy usage for separating alcohol-water mixtures using a hybrid vapor stripping-vapor permeation process, *Journal of Chemical Technology and Biotechnology* 90 (8) (2015) 1380–1390. doi:[10.1002/jctb.4695](https://doi.org/10.1002/jctb.4695).
- [18] C. Lipski, P. Coté, The use of pervaporation for the removal of organic contaminants from water, *Environmental Progress* 9 (4) (1990) 254–261. doi:[10.1002/ep.670090420](https://doi.org/10.1002/ep.670090420).
- [19] H. Morishita, J. Masamoto, T. Hata, Process for producing high purity formaldehyde. Patent US4962235A (apr 1989).
- [20] Sigma-Aldrich, Polyethylene glycol 400 data sheet (2020).  
URL <https://pubchem.ncbi.nlm.nih.gov/substance/24852060>
- [21] J. Masamoto, J. Ohtake, M. Kawamura, Process for producing formaldehyde and derivatives thereof. Patent US4967014 (feb 1989).
- [22] M. Ott, H. H. Fischer, M. Maiwald, K. Albert, H. Hasse, Kinetics of oligomerization reactions in formaldehyde solutions: NMR experiments up to 373K and thermodynamically consistent model, *Chemical Engineering and Processing: Process Intensification* 44 (6) (2005) 653–660. doi:[10.1016/j.cep.2003.07.004](https://doi.org/10.1016/j.cep.2003.07.004).
- [23] N. Schmitz, E. Ströfer, J. Burger, H. Hasse, Conceptual Design of a Novel Process for the Production of Poly(oxymethylene) Dimethyl Ethers from Formaldehyde and Methanol, *Industrial and Engineering Chemistry Research* 56 (40) (2017) 11519–11530. doi:[10.1021/acs.iecr.7b02314](https://doi.org/10.1021/acs.iecr.7b02314).

- [24] C. Kuhnert, M. Albert, S. Breyer, I. Hahnenstein, H. Hasse, G. Maurer, Phase Equilibrium in Formaldehyde Containing Multicomponent Mixtures: Experimental Results for Fluid Phase Equilibria of (Formaldehyde + (Water or Methanol) + Methylal)) and (Formaldehyde + Water + Methanol + Methylal) and Comparison with Predictions, *Industrial & Engineering Chemistry Research* 45 (14) (2006) 5155–5164. doi:10.1021/ie060131u.
- [25] Department of Chemical Engineering, Brigham University, Pravo, Utah, Thermophysical Properties Laboratory Project 801, Thermophysical Properties Laboratory Project 801 (2009).
- [26] M. Albert, Thermodynamische Eigenschaften formaldehydhaltiger Mischungen, Phd thesis (1999).
- [27] D. Bongartz, J. Burre, A. Mitsos, Production of Oxymethylene Dimethyl Ethers from Hydrogen and Carbon Dioxide - Part I: Modeling and Analysis for OME1, *Industrial and Engineering Chemistry Research* 58 (12) (2019) 4881–4889. doi:10.1021/acs.iecr.8b05576.
- [28] N. Schmitz, Production of poly(oxymethylene) dimethyl ethers from formaldehyde and methanol, Phd thesis, Technical University of Kaiserslautern (2018).
- [29] G. Towler, R. K. Sinnott, Chemical engineering design: principles, practice and economics of plant and process design, Elsevier, 2012.
- [30] Chemical Engineering Plant Cost Index (2021).  
URL <https://www.chemengonline.com/pci-home>
- [31] Statista, Avg. Exchange Rate Euro/Dollar (2021).  
URL <https://de.statista.com/statistik/daten/studie/200194/umfrage/wechselkurs-des-euro-gegenueber-dem-us-dollar-seit-2001/>
- [32] Methanex, Methanex Monthly Average Regional Posted Contract Price History (2020).  
URL <https://www.methanex.com/sites/default/files/MxAvgPrice Nov 30 2021.xls>
- [33] Monitoringbericht 2018 (2018).  
URL Bundesnetzagentur Monitoringbericht 2018
- [34] R. Turton, Analysis, synthesis, and design of chemical processes, 3rd Edition, Prentice Hall PTR international series in the physical and chemical engineering sciences, Prentice Hall, Upper Saddle River, N.J, 2009.
- [35] P. Stephan, S. Kabelac, M. Kind, D. Mewes, K. Schaber, T. Wetzel, VDI-Wärmeatlas: Fachlicher Träger VDI-Gesellschaft Verfahrenstechnik und Chemieingenieurwesen, Springer-Verlag Berlin Heidelberg, 2019.
